# Supplementary material
Source: PubMed Central journal article supplement (PMC8052853)

Additional File 2, Figure 1. Scabies scenario

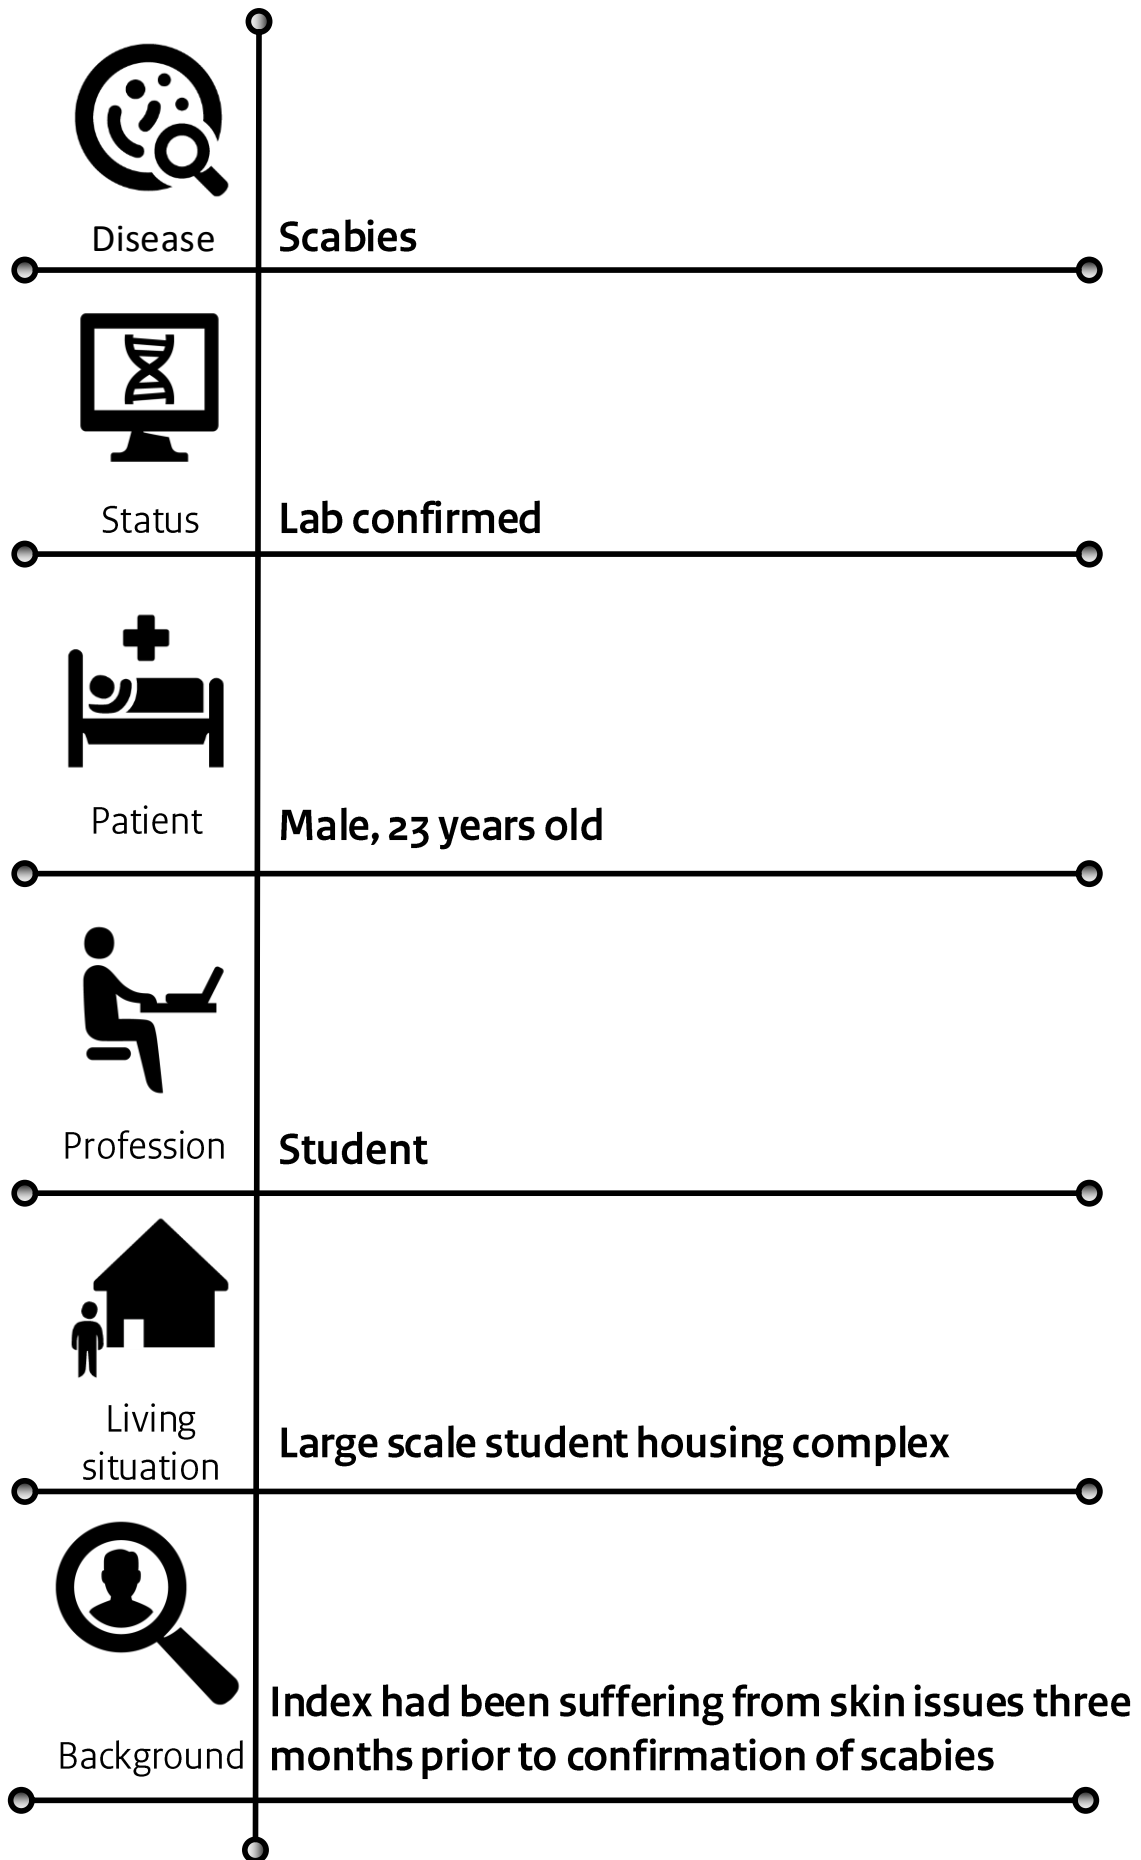

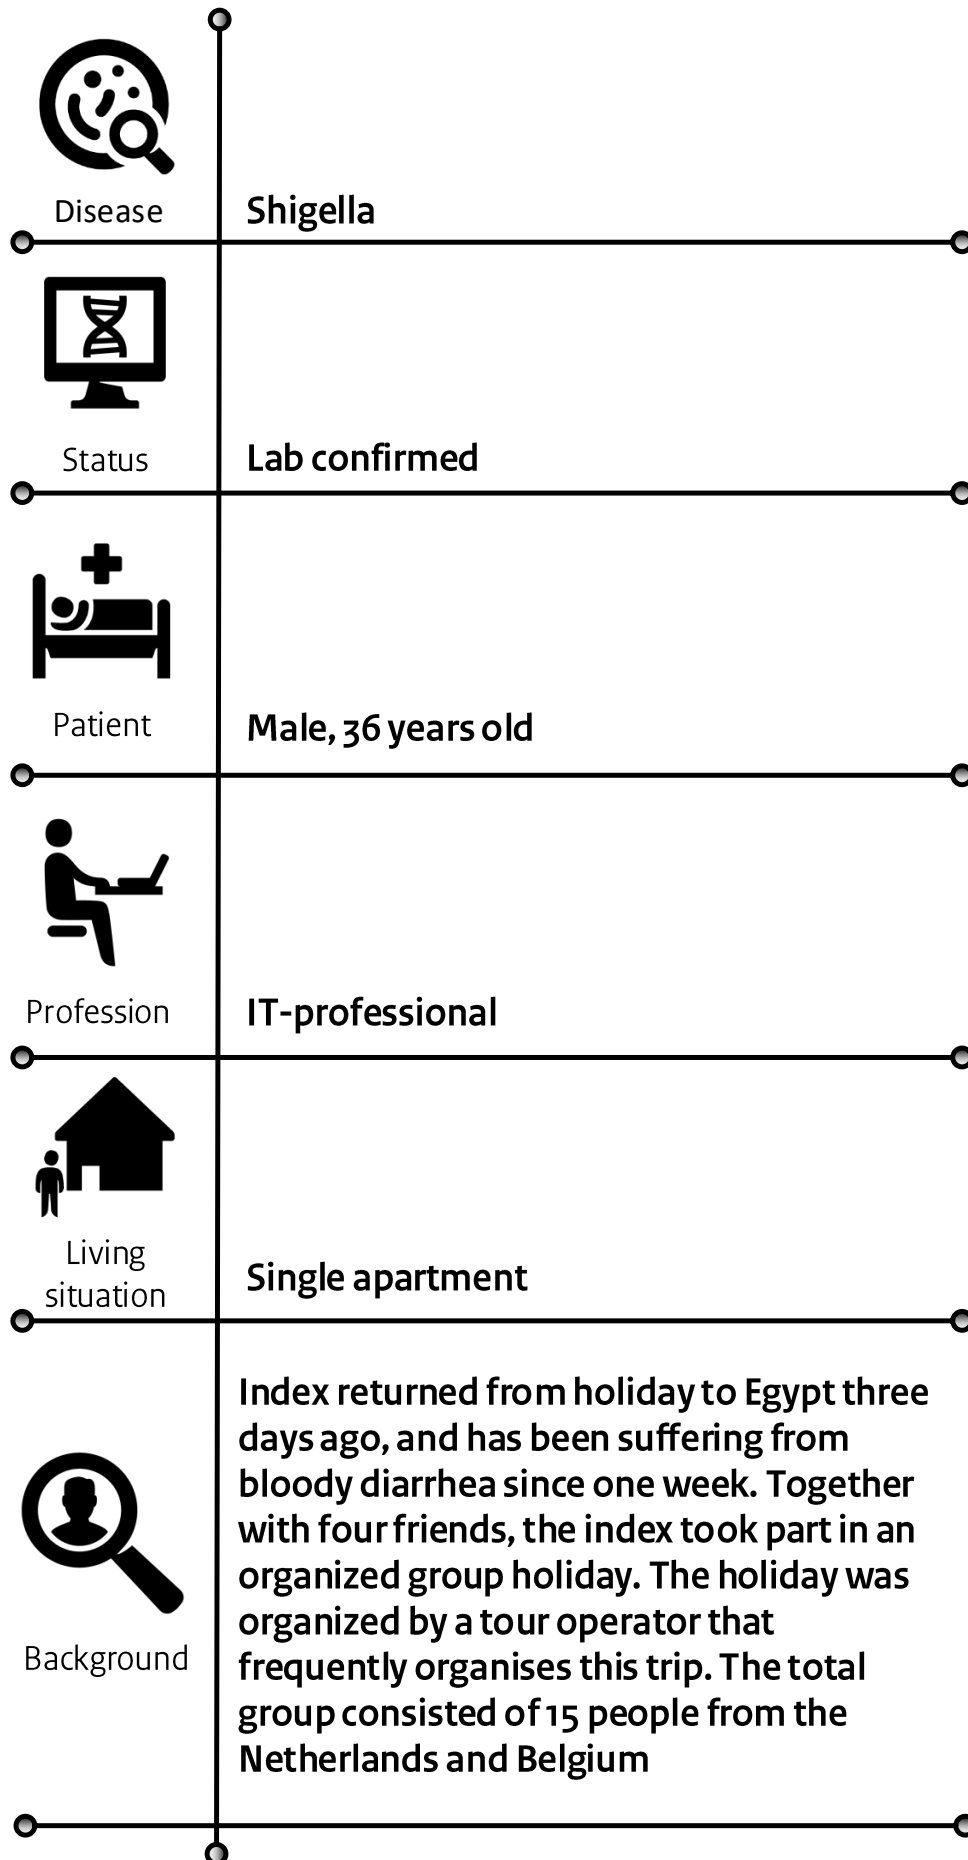

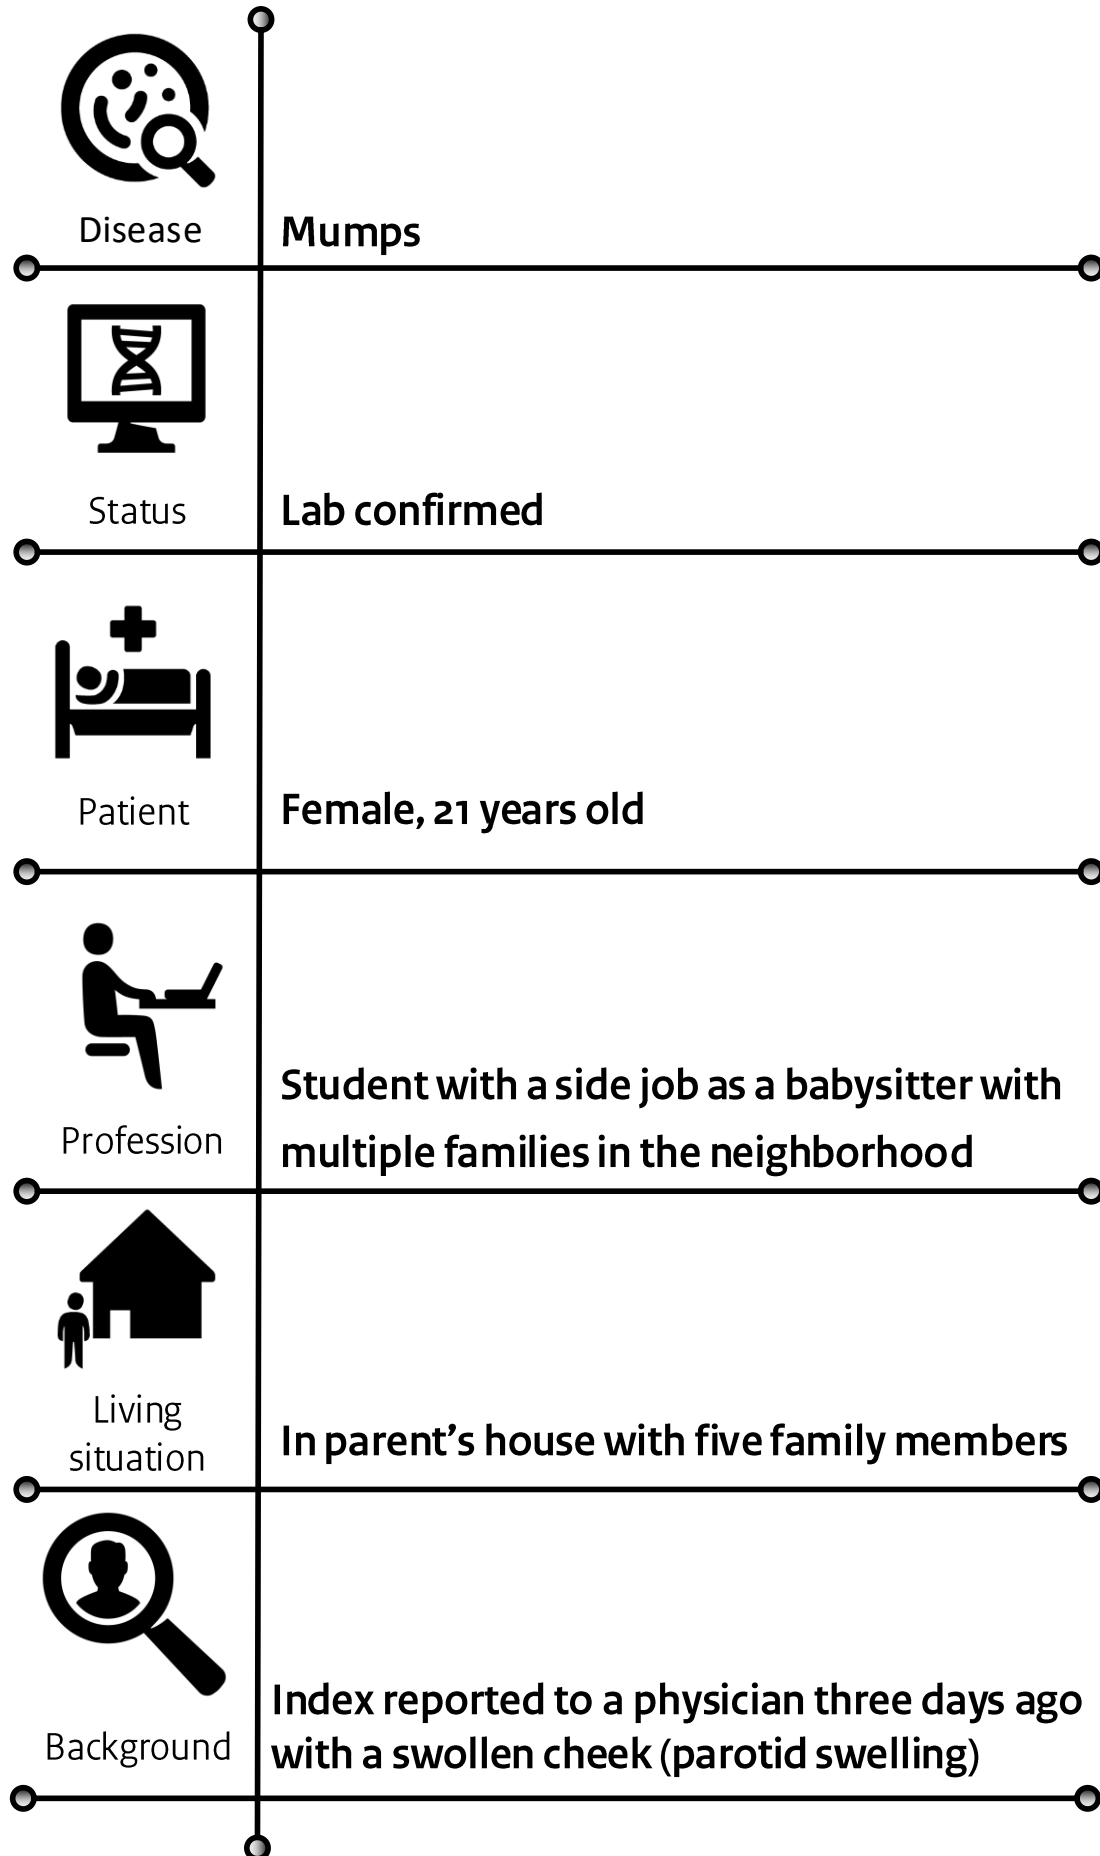

Supplement: 12879_2021_6052_MOESM2_ESM.pdf [file 12879_2021_6052_MOESM2_ESM.pdf]
